# Supplementary material for: Coarsening dynamics of ferromagnetic granular networks—experimental results and simulations
Source: Royal Society of Chemistry journal article supplement (doi:10.1039/c7sm00796e), 2017-12-11
Supplement: c7sm00796e6.pdf [file c7sm00796e6.pdf]

# Electronic Supplemental Material to Coarsening dynamics of ferromagnetic granular networks — experimental results and simulations

Armin Kögel,<sup>a</sup> Pedro A. Sánchez,<sup>b</sup> Robin Maretzki,<sup>a</sup>  
Tom Dumont,<sup>a</sup> Elena S. Pyanzina,<sup>c</sup> Sofia S. Kantorovich,<sup>b,c</sup> and Reinhard Richter<sup>a\*</sup>

December 19, 2017

## Supplementary movie SM1

This movie is showing the network formation in the experiment after a sudden quench of the shaker amplitude from  $\Gamma = 3g$  to  $\Gamma = 1.9g$ . Note that the steel spheres appear black, whereas the glass spheres appear grey. The movie is associated with Fig.2b of the article.

## Supplementary movie SM2

This movie is a transformation of the movie SM1, where only the connecting lines in-between the steel spheres are shown. The movie is associated with Fig. 14 of the article.

## Supplementary movie SM3

The movie is presenting numerical results for the system S2, which has no central attraction ( $\epsilon_a = 0$ ). Magnetic particles are plotted in black, non magnetic in light grey. Neighbouring contacts between particles forming clusters are marked in orange. For further details see Fig. 19 of the article.

## Supplementary movie SM4

The movie is presenting numerical results for the system S3, with a central attraction of  $\epsilon_a = 0.5$ . For further details see Fig. 19 of the article.

## Supplementary movie SM5

The movie is presenting numerical results for the system S3, with a central attraction of  $\epsilon_a = 1.0$ . For further details see Fig. 19 of the article.

---

<sup>0a</sup> *Experimentalphysik 5, University of Bayreuth, 95440 Bayreuth, Germany*

<sup>0b</sup> *University of Vienna, Sensengasse 8, Vienna, 1090, Austria*

<sup>0c</sup> *Ural Federal University, Lenin av. 51, Ekaterinburg, 620000, Russia*

<sup>0\*</sup> *author for correspondence: reinhard.richter@uni-bayreuth.de*
